# Supplementary material for: In vivo safety and efficacy testing of a thermally triggered injectable hydrogel scaffold for bone regeneration and augmentation in a rat model
Source: PubMed Central journal article supplement (PMC5915072; doi:10.18632/oncotarget.24813), 2018-04-06
Supplement: oncotarget-09-18277-s001.pdf [file oncotarget-09-18277-s001.pdf]

## ***In vivo* safety and efficacy testing of a thermally triggered injectable hydrogel scaffold for bone regeneration and augmentation in a rat model**

### **SUPPLEMENTARY MATERIALS**

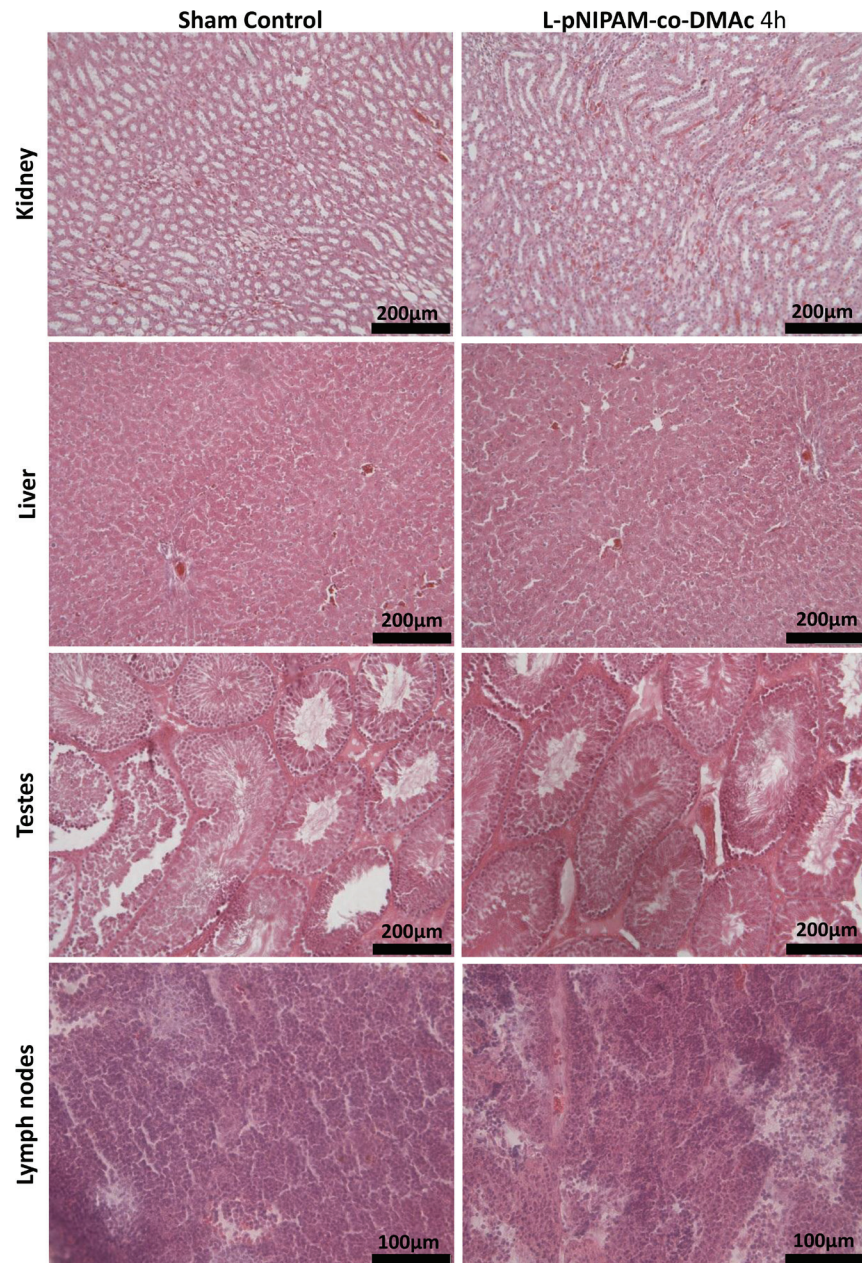

**Supplementary Figure 1: Initial biocompatibility of the hydrogel was evaluated by subcutaneous implantation of hydrogel constructs in young 10–12 weeks old male Wistar rats for 6 weeks. Representative microscopic images of kidney, liver, testes and lymph nodes stained with H&E from either sham operated control animals or hydrogel (L-pNIPAM-co-DMA-4h) implanted animals. Scale bar: 200 μm or 100 μm.**

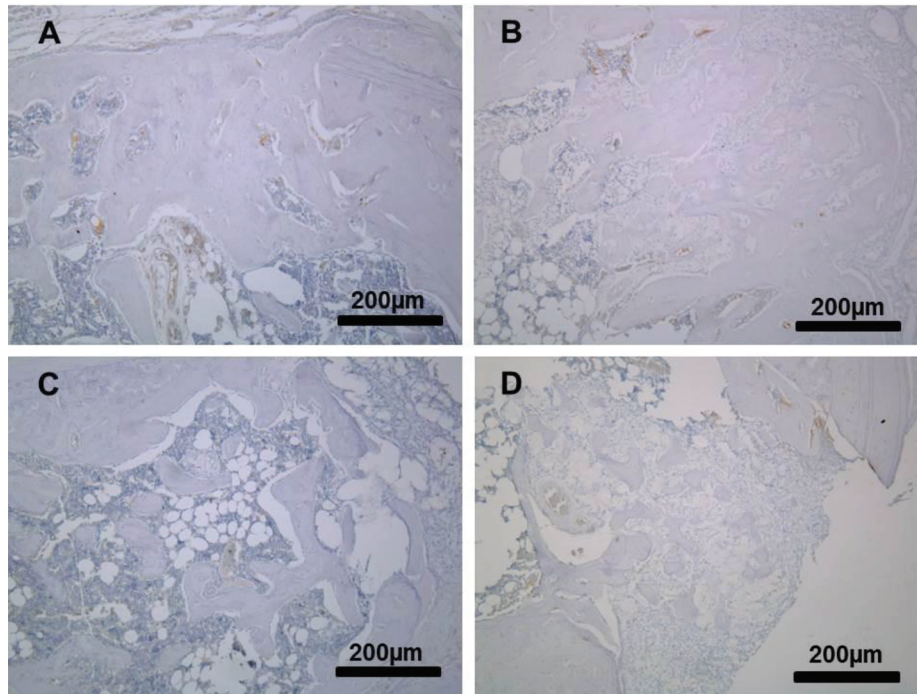

**Supplementary Figure 2: CD68 Immunohistochemistry assessment of the defect site from in exbreeder female (>7months old) white wistar rats.** A non critical sized defect was created in the midshaft of the femur, left void to serve as a control or injected with with L-pNIPAM-co-DMAc hydrogel with/without MSCs and HAPna and maintained for 4 weeks. Image shown represents an animal selected from each experimental group where the mid-range bone repair was observed from  $n = 6$  replicates. Experimental groups: (A) Sham operated controls, (B) acellular L-pNIPAM-co-DMAc hydrogel, (C) acellular L-pNIPAM-co-DMAc hydrogel with HAPna, and (D) L-pNIPAM-co-DMAc hydrogel with incorporated MSCs and HAPna. Scale bar: 200  $\mu\text{m}$ .

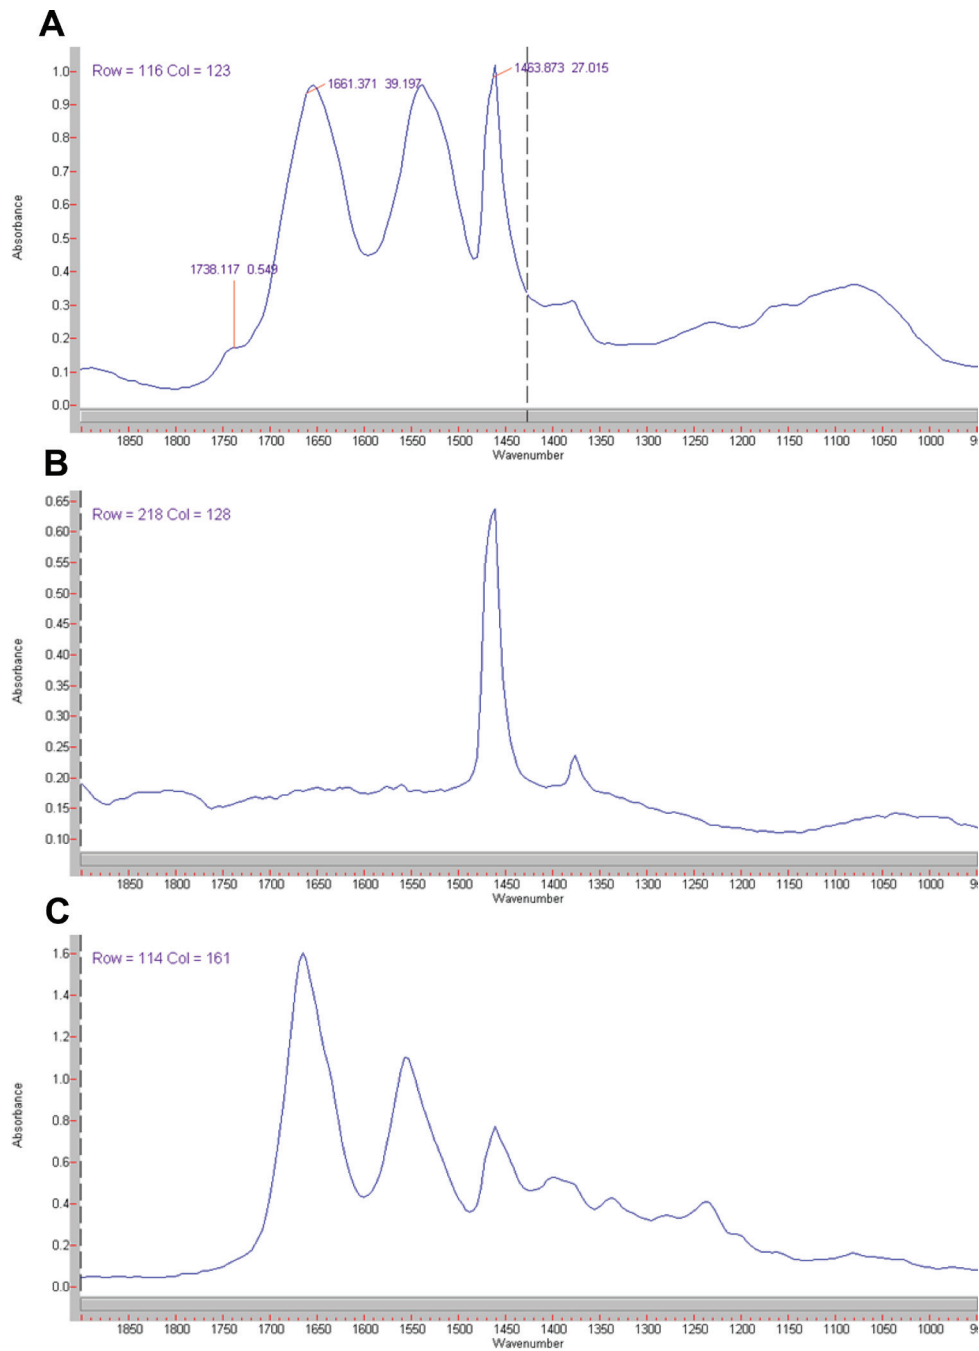

**Supplementary Figure 3:** Typical FTIR spectra showing carbonyl (1738), amide (1661) and wax (1483) (A), wax (B) and tissue region away from defect (C).

**Supplementary Table 1: Hydrogels with MSCs investigated for bone regeneration.** See Supplementary\_Table\_1

**Supplementary Table 2: Alizarin red staining of implantation sites**

| Animal Replicate | L-pNIPAM-4h | L-pNIPAM-24h | L-pNIPAM-co-DMAc 4h | L-pNIPAM-co-DMAc-24h |
|------------------|-------------|--------------|---------------------|----------------------|
| 1                | ×           |              |                     |                      |
| 2                |             |              |                     | ×                    |
| 3                | ×           | ×            | ×                   | ×                    |
| 4                | ×           | ×            |                     |                      |
| 5                |             | ×            |                     |                      |
| 6                | ×           |              |                     |                      |

(X) Indicates animals where calcium deposits were observed within the hydrogel.
